# Supplementary material for: Organizational Total Information Quality Management Network Analysis.
Source: MDPI journal article supplement (doi:10.3390/v14040769), 2008-01-01
Supplement: s1 [file s1]

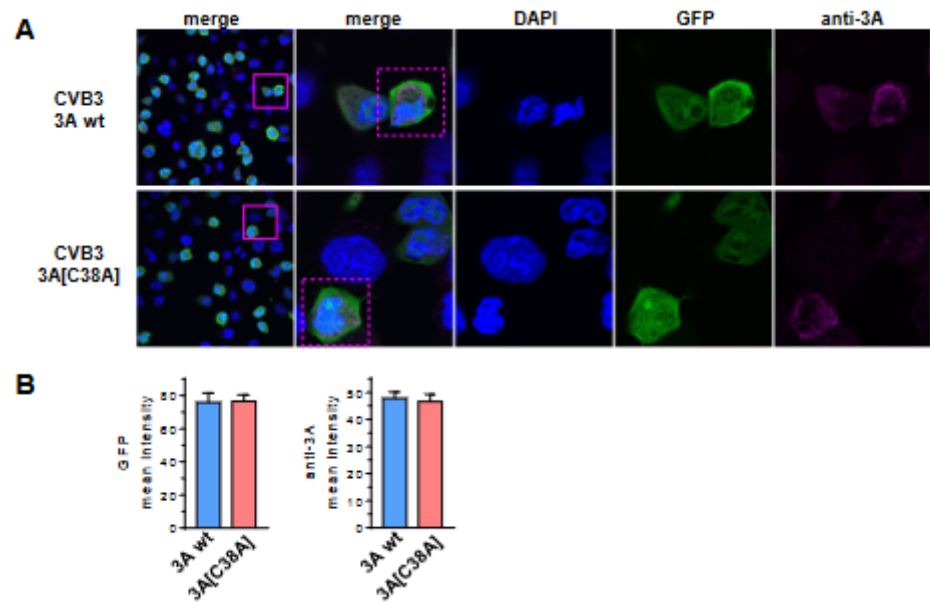

**Figure S1. (for Figure 2):** Quantitative comparison of intensity distributions and autocorrelation-based image correlation spectroscopy. **(A)** For the analysis of anti-3A immunofluorescence distribution in cells infected with GFP-CVB3 encoding protein 3A wt or 3A[C38A], cells with similar intensities (dashed square) of the GFP fluorescence and anti-3A immunofluorescence were selected. **(B)** The bar charts depict the mean intensities of GFP and anti-3A signals of selected cells used for the quantitative comparison of intensity distributions and autocorrelation-based image correlation spectroscopy (n=15).
